# Supplementary material
Source: MDPI journal article supplement (https://www.mdpi.com/2313-0105/8/5/46)
Supplement: s1 [file s1 › batteries-1713520-supplementary.pdf]

For a deeper understanding of the electrochemical performance of the pouch cells using a reference cathode and anodes with varied active materials and calendaring degrees the voltage curves are given for the tested C-rates. In Figure S1 the voltage is plotted against the capacity of the NMC622 cathode.

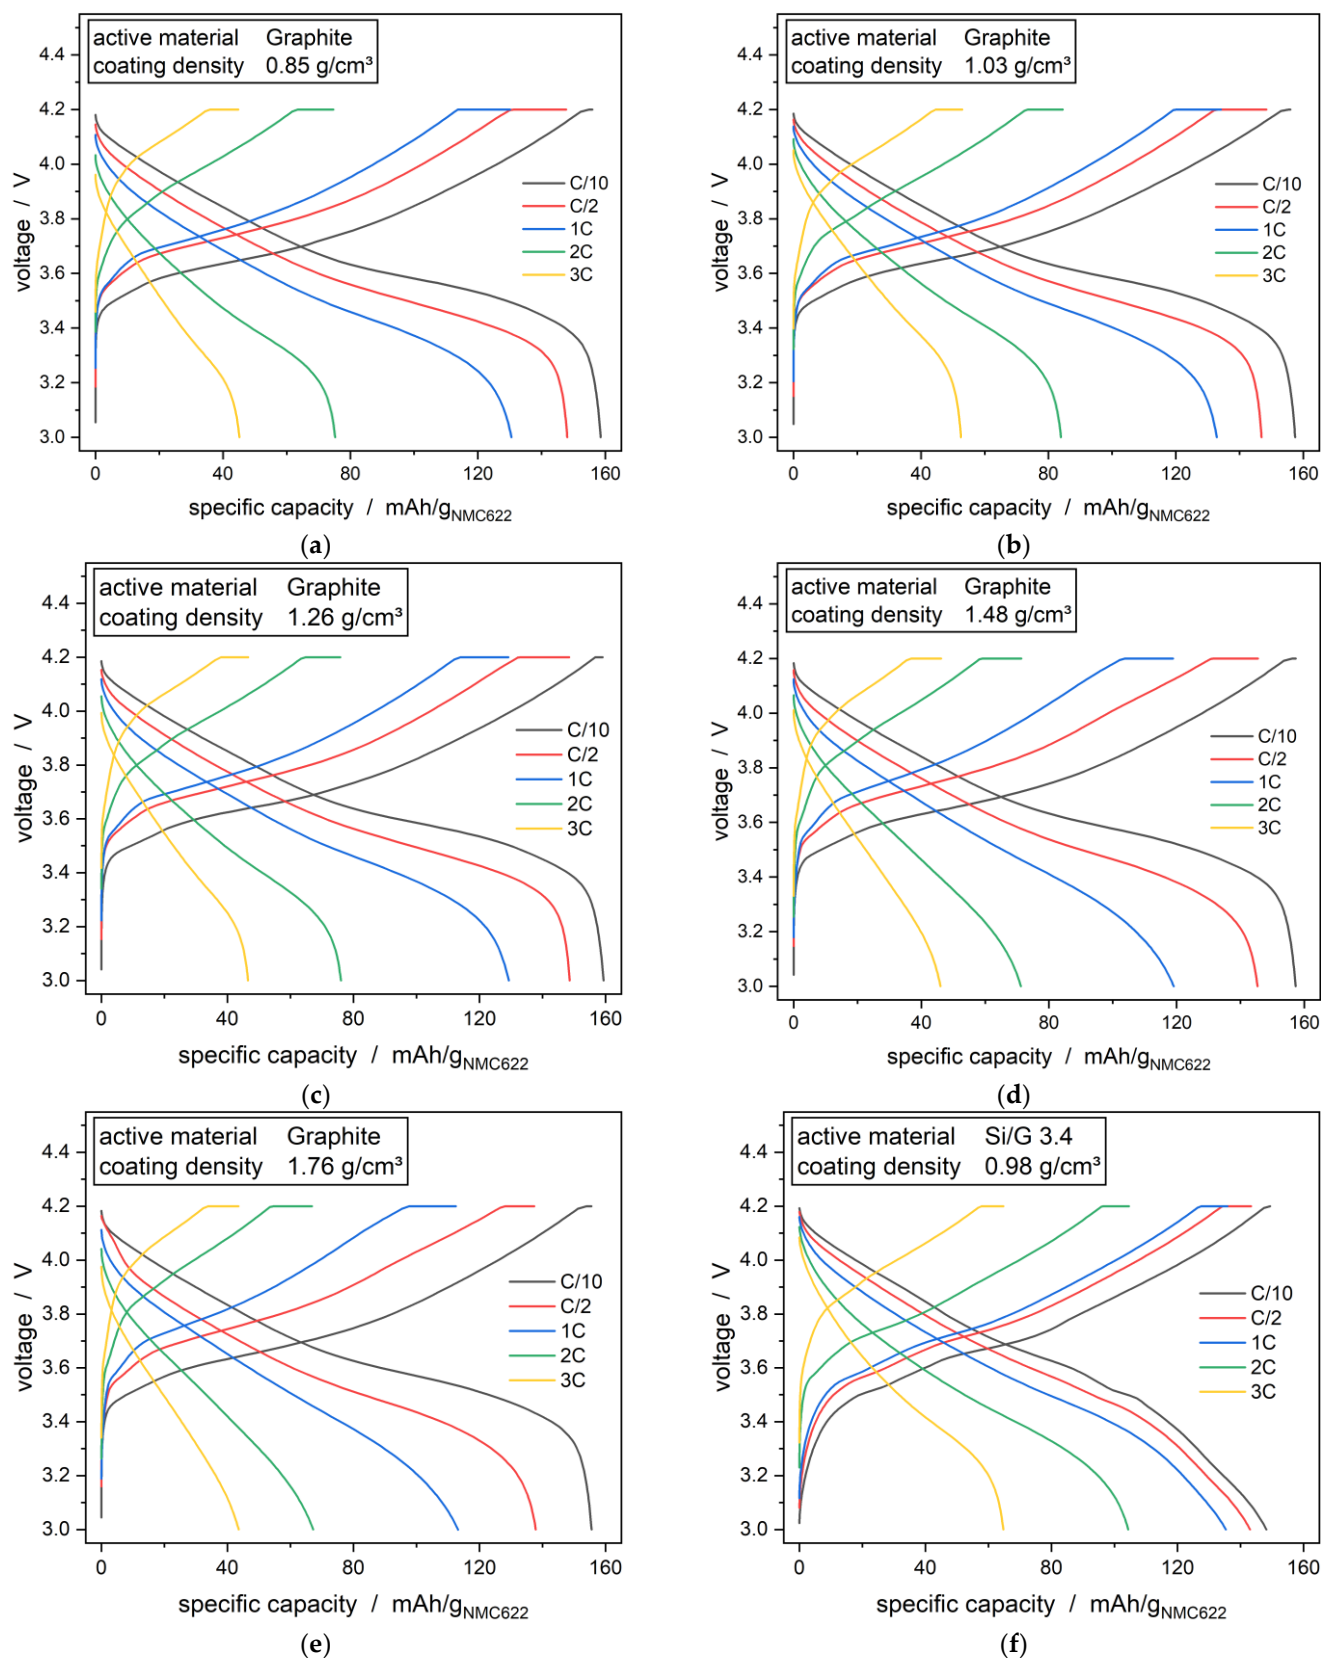

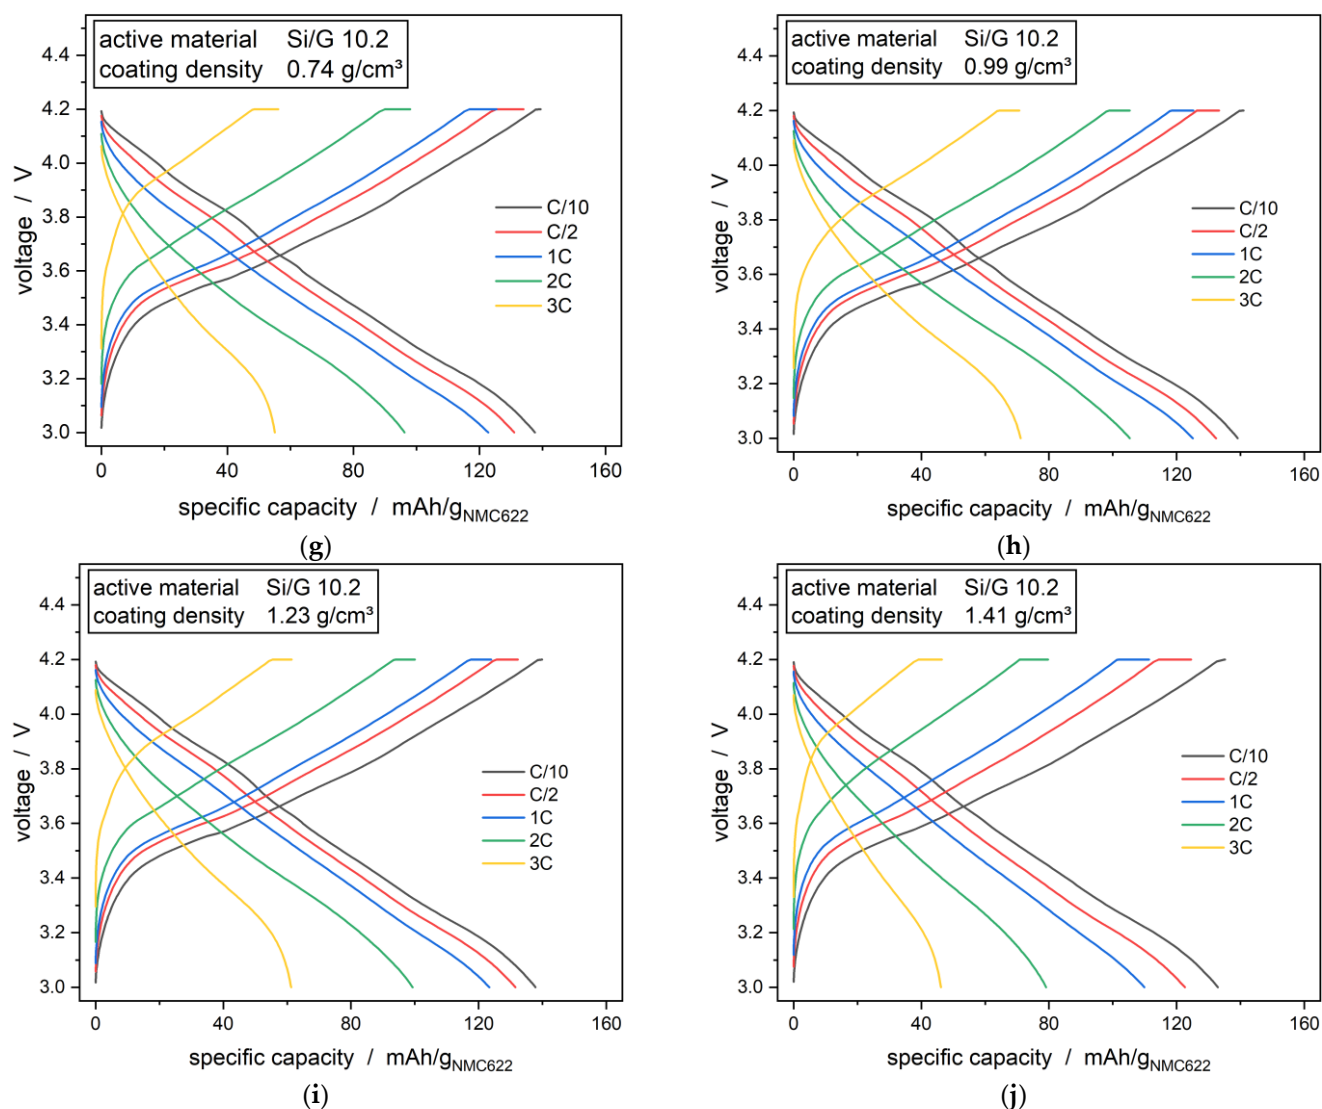

**Figure S1.** Voltage curves at different c-rates for the (a) graphite electrode at 0.85 g/cm<sup>3</sup>; (b) graphite electrode at 1.03 g/cm<sup>3</sup>; (c) graphite electrode at 1.26 g/cm<sup>3</sup>; (d) graphite electrode at 1.48 g/cm<sup>3</sup>; (e) graphite electrode at 1.76 g/cm<sup>3</sup>; (f) Si/G 3.4 electrode at 0.98 g/cm<sup>3</sup>; (g) Si/G 10.2 electrode at 0.74 g/cm<sup>3</sup>; (h) Si/G 10.2 electrode at 0.99 g/cm<sup>3</sup>; (i) Si/G 10.2 electrode at 1.23 g/cm<sup>3</sup>; (j) Si/G 10.2 electrode at 1.41 g/cm<sup>3</sup>.
